# Supplementary material for: A noncanonical function of cGAMP in inflammasome priming and activation
Source: PubMed Central journal article supplement — J Exp Med. 2017 Dec 4;214(12):3611–26. doi: 10.1084/jem.20171749 (PMC5716045; doi:10.1084/jem.20171749), 2017-12-04
Supplement: JEM_20171749_sm.pdf [file JEM_20171749_sm.pdf]

## SUPPLEMENTAL MATERIAL

Swanson et al., <https://doi.org/10.1084/jem.20171749>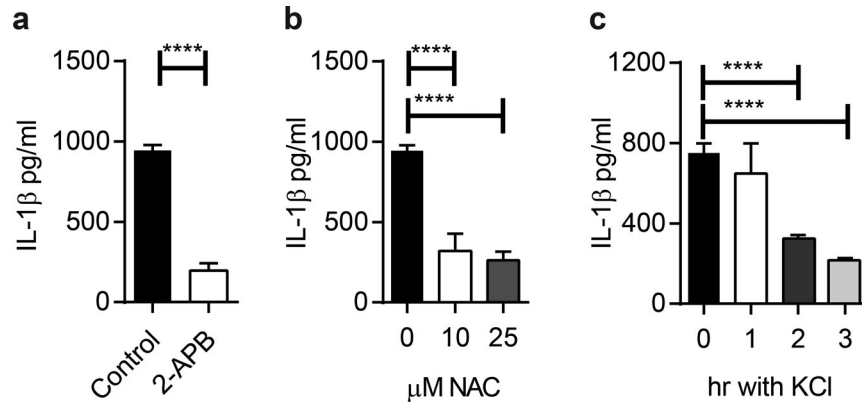

Figure S1. **cGAMP induces  $K^+/Ca^{2+}$ - and ROS-dependent inflammasomes.** (a and b) IL-1 $\beta$  ELISAs from supernatants of BMDMs primed with LPS and treated with vehicle or 2-APB (a) or *n*-acetyl-cysteine (NAC; b) at the indicated concentrations followed by transfection with 2'3'-cGAMP for 6 h. (c) IL-1 $\beta$  ELISAs from BMDMs primed with LPS, followed by transfection with 2'3'-cGAMP. Extracellular KCl added for the last 1, 2, or 3 h of induction.  $n = 3$  independent experiments. Error bars, SD; \*\*\*\*,  $P < 0.0001$ .

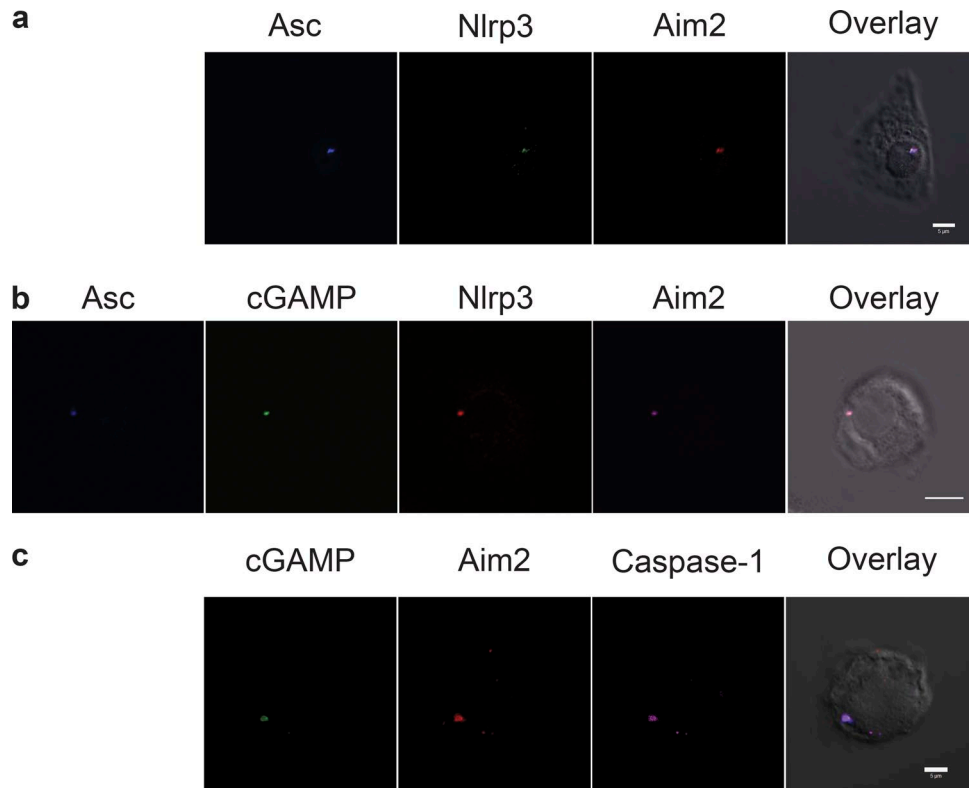

Figure S2. **cGAMP induces complexes containing both NLRP3 and AIM2.** Confocal microscopy of JAWSII cells expressing AIM2-Flag pulsed with doxycycline during LPS priming. (a–c) Cells were transfected with 2'3'-cGAMP (a), a 30:1 mixture of 2'3'-cGAMP and fluorescein-labeled 2'3'-cGAMP (b), or rhodamine-dAdT followed by FLICA-660 (c). Cells were labeled with primary antibodies to Asc, Nlrp3, and Flag (for AIM2-Flag) followed by Alexa Fluor-labeled secondary antibodies. Shown are pseudocolored images. Bars, 5  $\mu$ m.

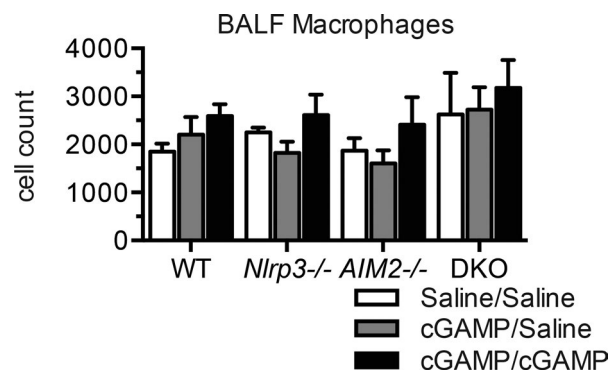

Figure S3. **Bronchiolar macrophage cell count after cGAMP administration.** WT, *Aim2*<sup>-/-</sup>, *Nlrp3*<sup>-/-</sup>, and *Aim2*<sup>-/-</sup> *Nlrp3*<sup>-/-</sup> DKO mice were intranasally dosed with 2'3'-cGAMP followed by a second dose 24 h later. 4 h after the second dose, BALF was collected, and cells were cytospun onto slides and stained with Diff-Quick solution for cell differentiation. Shown are total counts of bronchial macrophages. WT, *n* = 17; *Aim2*<sup>-/-</sup>, *n* = 10; *Nlrp3*<sup>-/-</sup>, *n* = 8; *Aim2*<sup>-/-</sup> *Nlrp3*<sup>-/-</sup> DKO, *n* = 8. Results are presented as the mean  $\pm$  SEM.
